# Supplementary material for: Studies on Biological and Molecular Effects of Small-Molecule Kinase Inhibitors on Human Glioblastoma Cells and Organotypic Brain Slices
Source: MDPI journal article supplement (doi:10.3390/life12081258), 2022-08-17
Supplement: s1 [file s1]

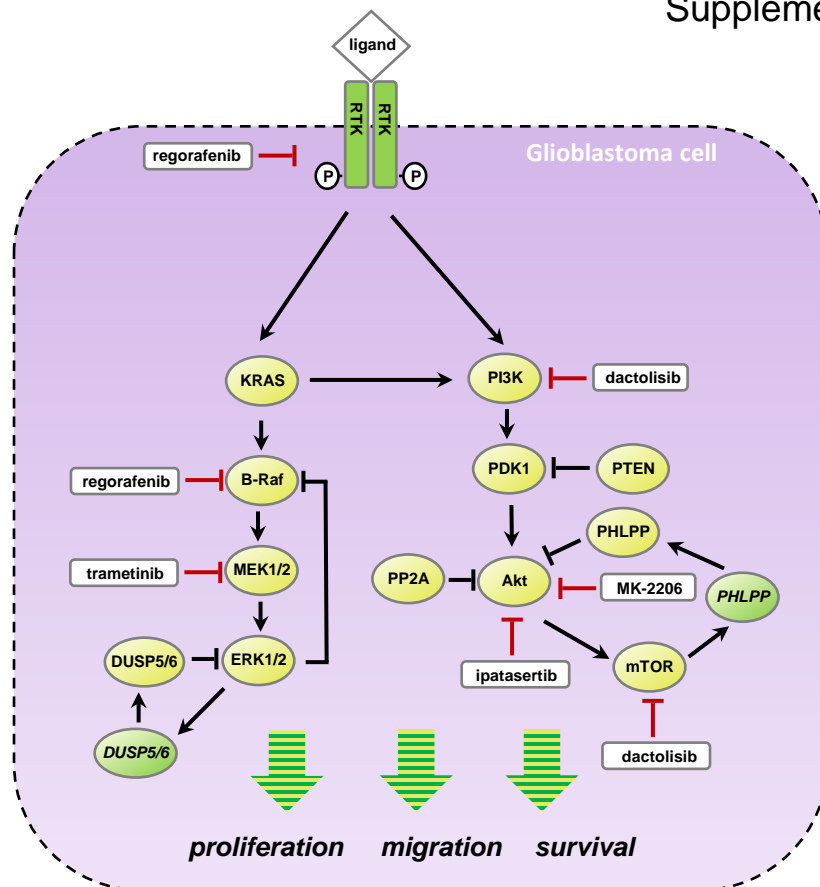

**Supplementary Figure S1:** Small-molecule kinase inhibitors address targets within the MAPK and PI3K/AKT/mTOR pathway and receptor tyrosine kinases. Abbrev.: Extracellular regulated kinase 1/2 (**ERK1/2**), dual-specificity phosphatase (**DUSP**), Kirsten rat sarcoma virus (**KRAS**), mitogen-activated protein kinase kinase 1/2 (**MEK1/2**), mammalian target of rapamycin (**mTOR**), phosphoinositide-dependent kinase-1 (**PDK1**), phosphoinositide 3-kinases (**PI3K**), PH domain and leucine rich repeat protein phosphatase (**PHLPP**), protein phosphatase 2 (**PP2A**), phosphatase and tensin homolog (**PTEN**), receptor tyrosine kinase (**RTK**)

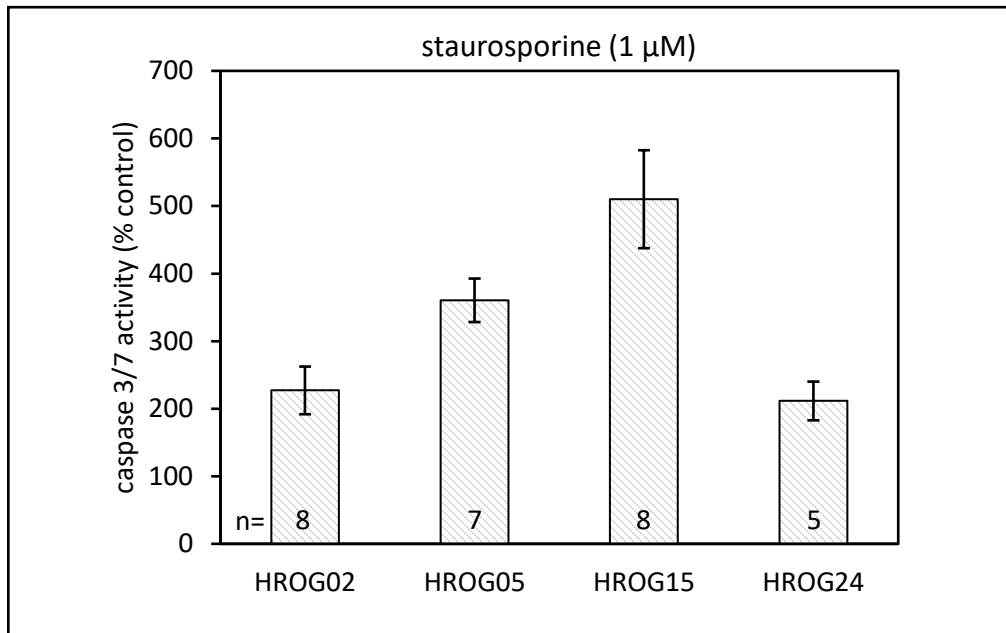

**Supplementary Figure S2:** Effects of staurosporine on caspase 3/7 activity in glioblastoma cells. Glioblastoma cells were challenged with staurosporine (1  $\mu$ M) for 2 hours. Afterwards, caspase 3/7 activity was estimated as described in Materials and methods section. Data are presented as mean  $\pm$  SEM for the indicated number (n) of biological replicates.

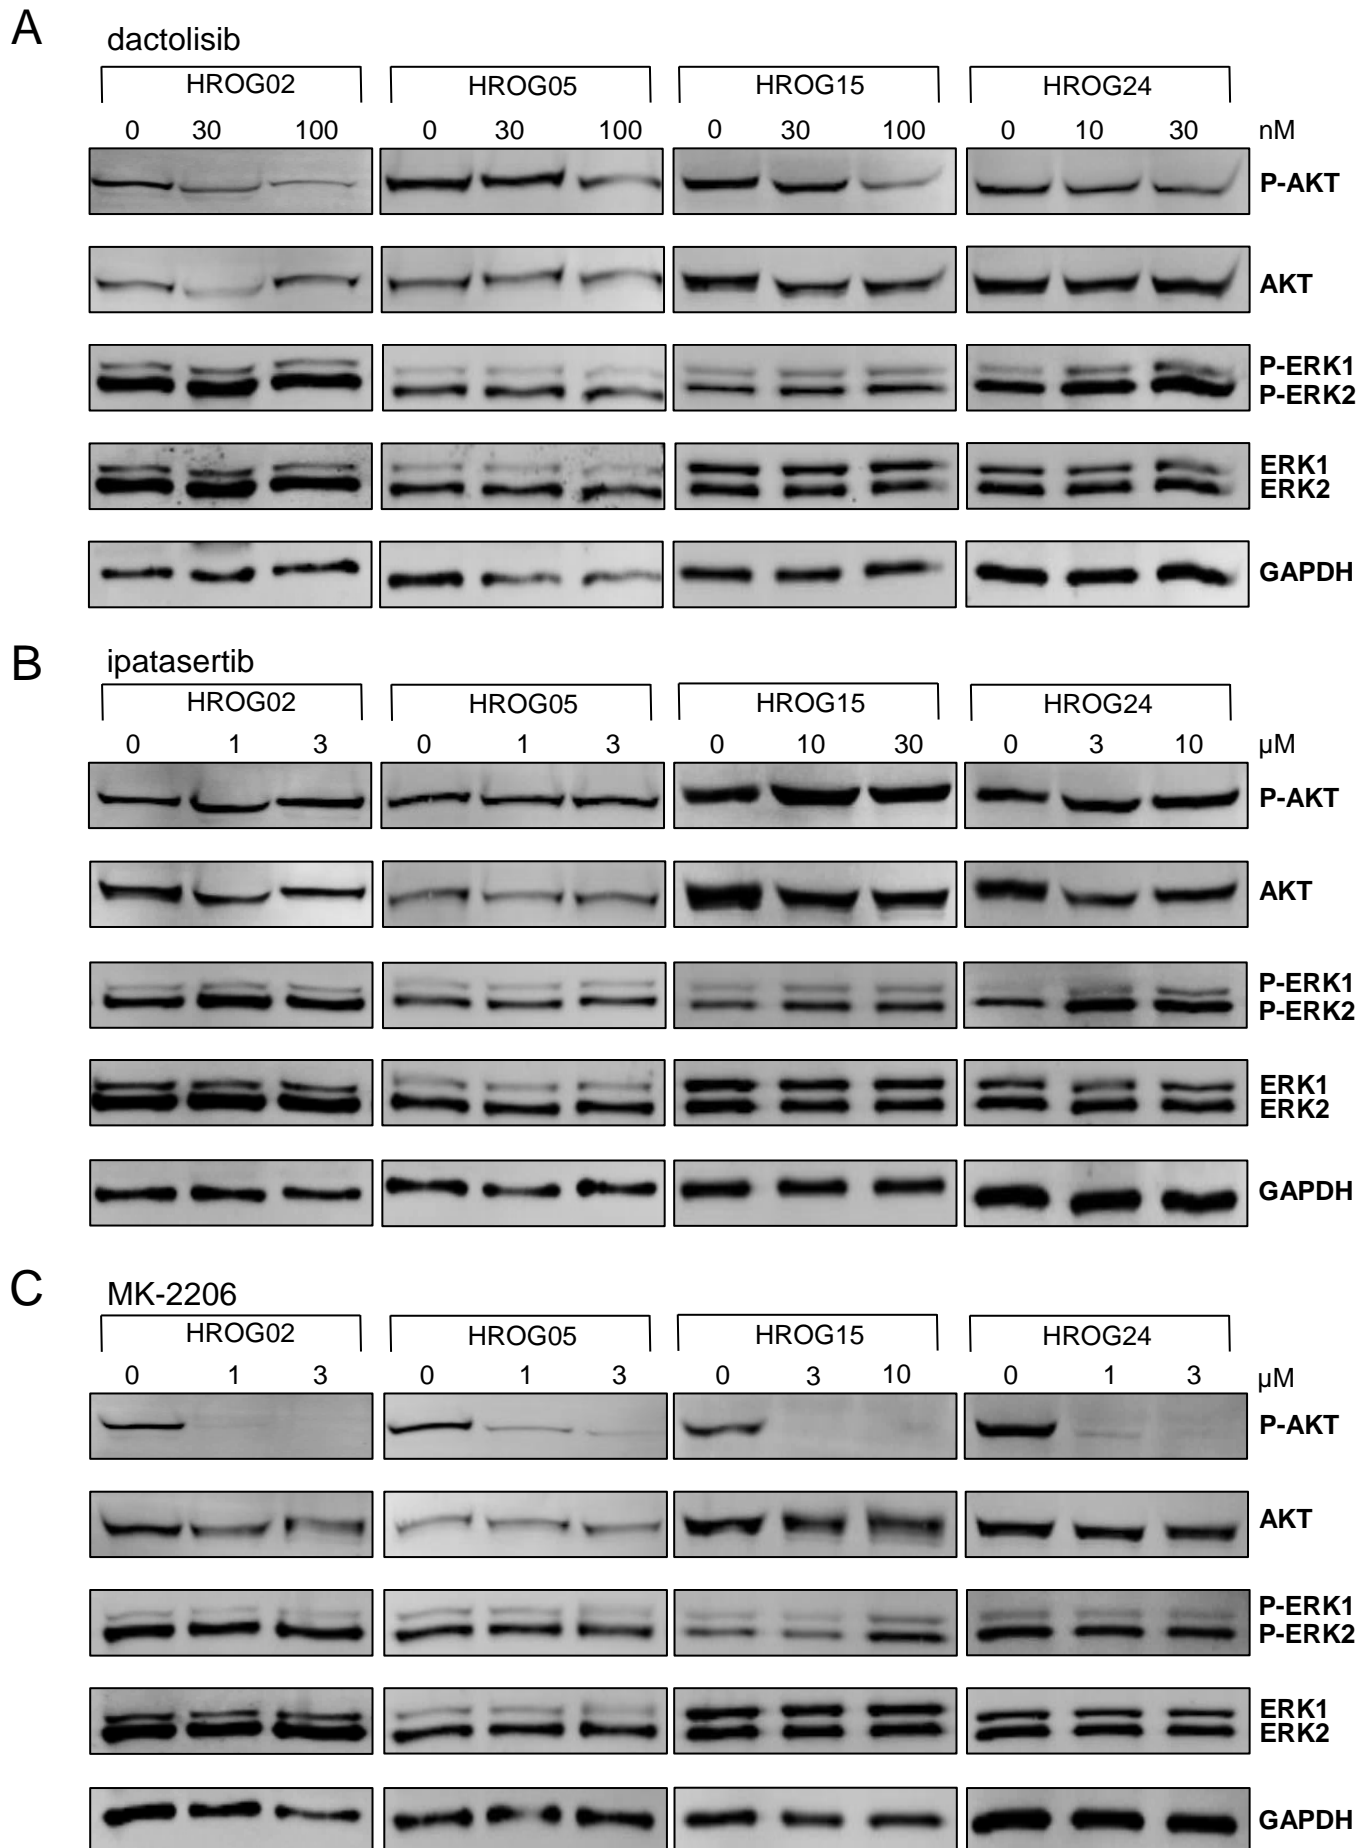

**Supplementary Figure S3:** Effects of dactolisib, ipatasertib and MK-2206 on the phosphorylation of AKT and ERK1/2 in glioblastoma cell lines. For each cell line, one representative blot is shown. For mean values of independent experiments, please refer to Figure 3.

A

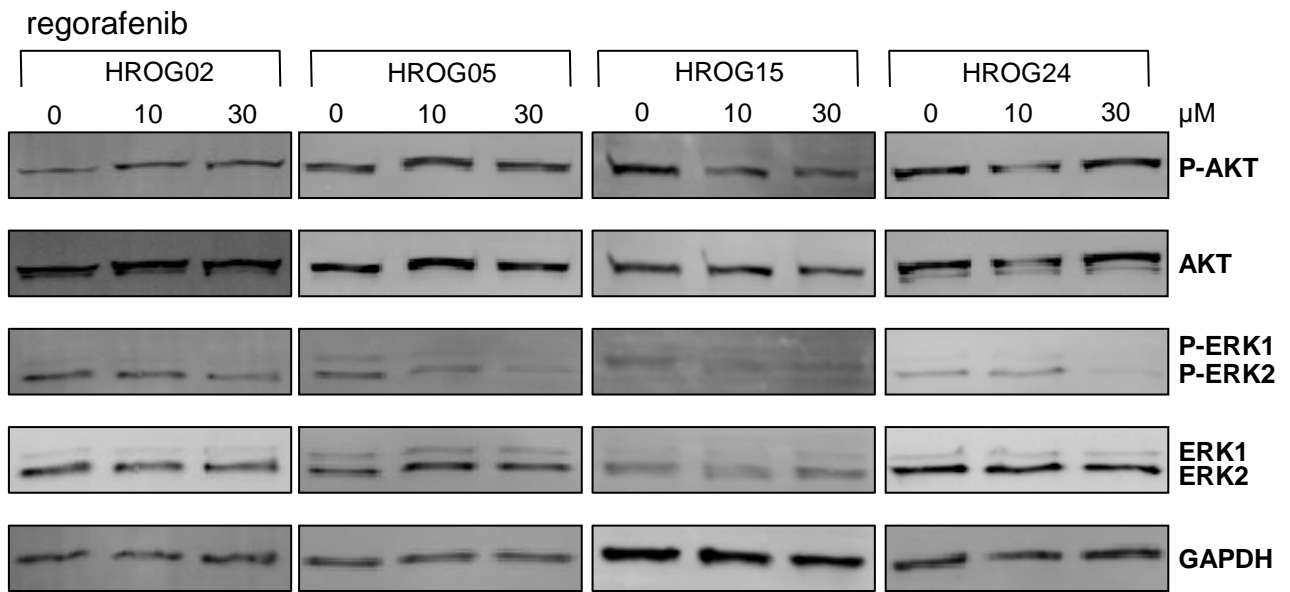

B

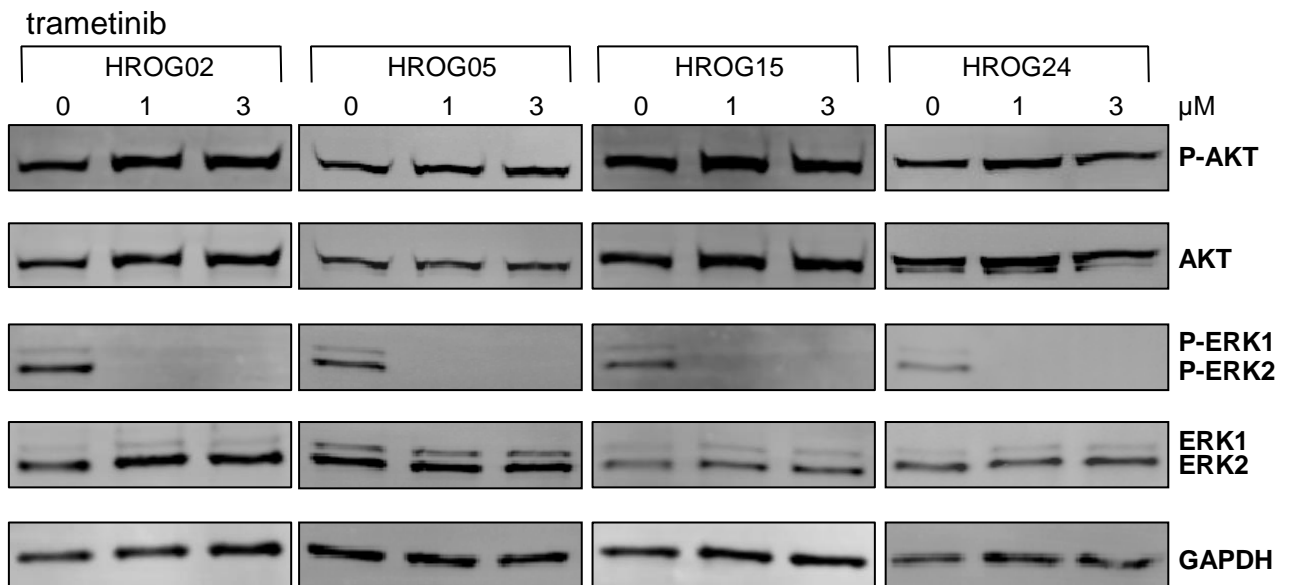

**Supplementary Figure S4:** Effects of regorafenib and trametinib on the phosphorylation of AKT and ERK1/2 in glioblastoma cell lines. For each cell line, one representative blot is shown. For mean values of independent experiments, please refer to Figure 4 in the manuscript.

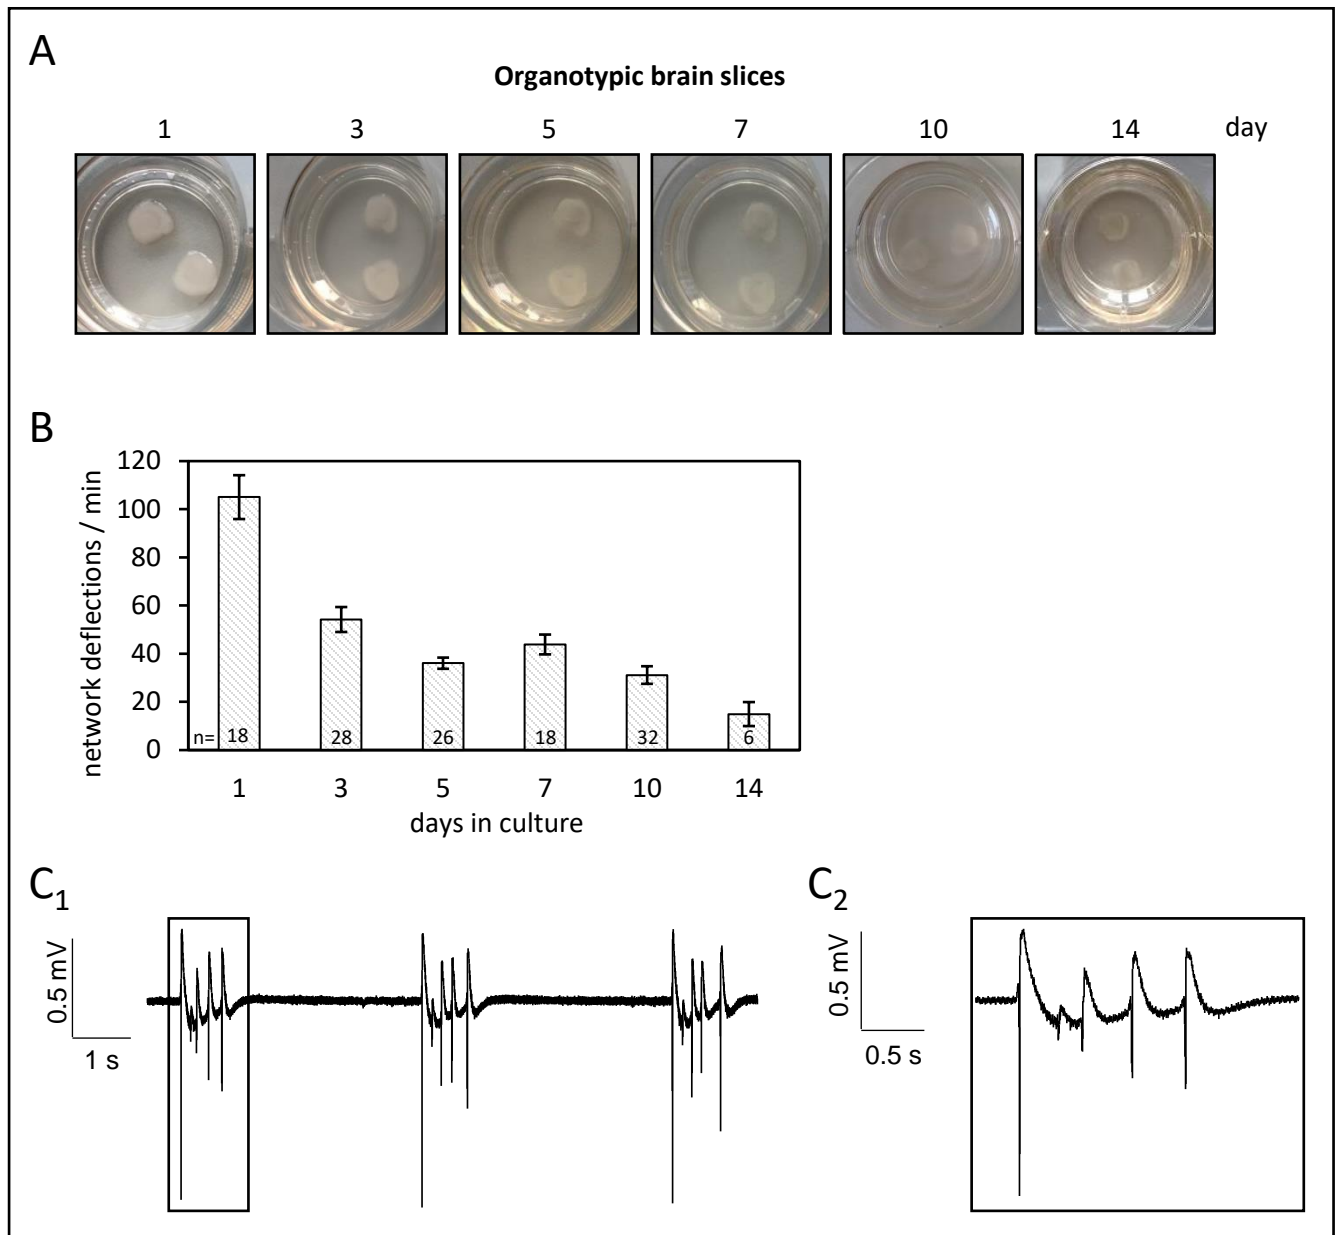

**Supplementary Figure S5:** Characterization of organotypic brain slices. Fischer 344 rats at the age of 6-8 days were sacrificed and coronal brain slices (350  $\mu$ m) were prepared. **(A)** The slices were cultured up to 14 days in Millicell, 6-well cell culture Inserts. **(B)** At the indicated days, network deflections were electrophysiologically recorded in cortical areas. Data represent mean  $\pm$  SEM, n=number of slices included in the analysis. **(C1,C2)** Representative sample trace of field potential recordings at day 3.

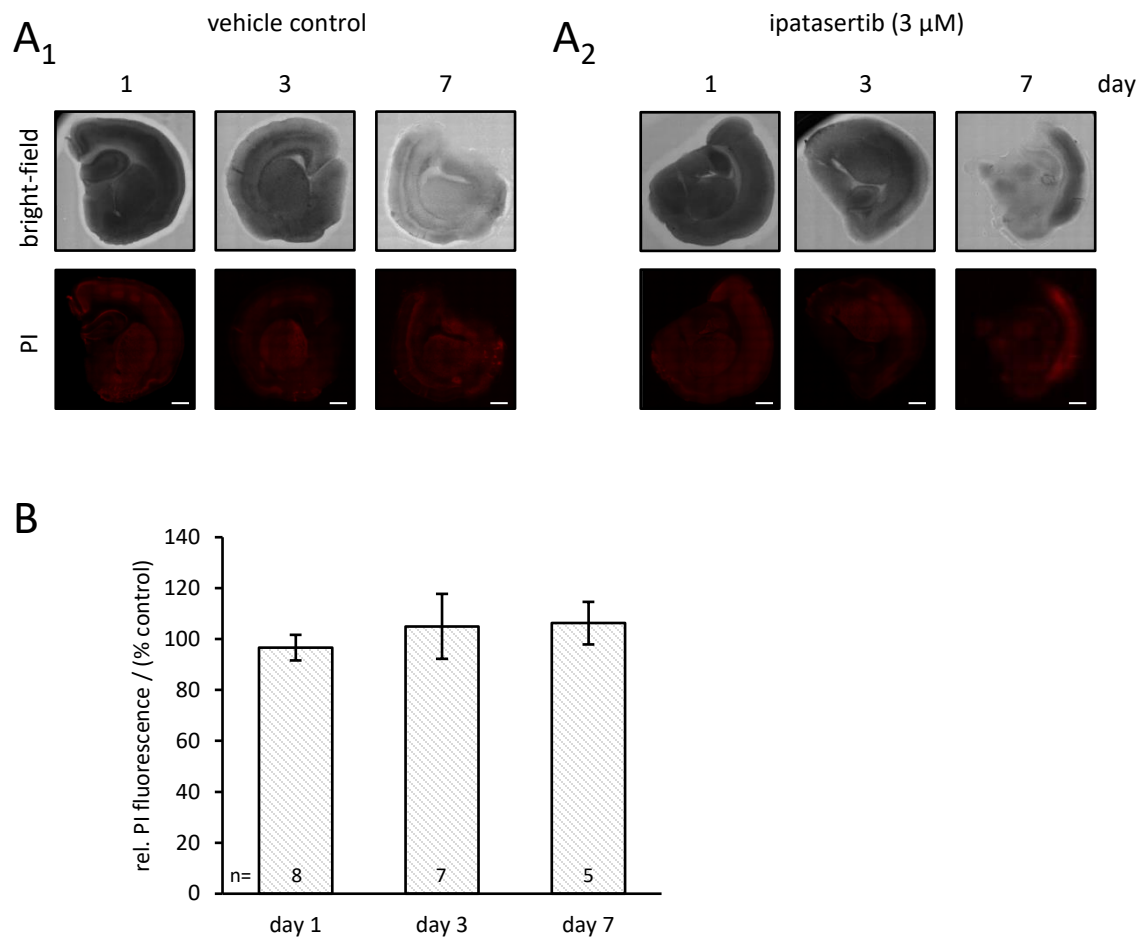

**Supplementary Figure S6:** Effect of ipatasertib on organotypic brain slices of Fischer 344 rats. Fischer rats at the age of 6-8 days were sacrificed and coronal brain slices (350  $\mu$ m) were prepared. The slices were cultured in complete culture medium (see Materials and methods for details). Starting with the day of preparation, the slices were exposed to (**A<sub>1</sub>**) vehicle or (**A<sub>2</sub>**) ipatasertib (3  $\mu$ M) for the indicated periods of time and stained with propidium iodide (PI) based on a standard protocol. Scale bar represents 1 mm. (**B**) Quantification of PI fluorescence. Data are represented as mean  $\pm$  SEM of PI fluorescence in comparison to control slices w/o ipatasertib of the same day, n=number of biological replicates included in the analysis. No significant changes between control cultures and ipatasertib-treated cultures were found (U test).

**Supplementary Figure S7:** Sample PVDF membranes of SMI effects on AKT and ERK1/2 activation in HROG24 cell cultures. Precision Plus Protein Dual Color Standards (BIO-RAD) and Prestained Protein Standard, Broad Range (11-250 kDa) biomarker (New England Biolabs) were used as molecular size markers. For further details see Materials and Methods section in the manuscript.

### Dactolisib

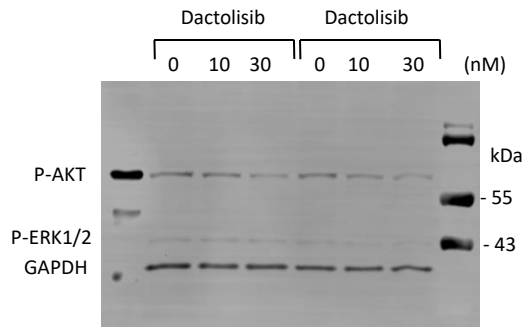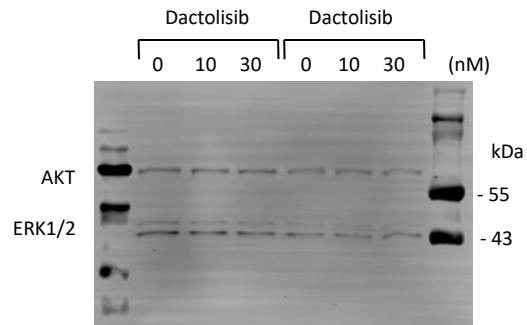

### Ipatasertib

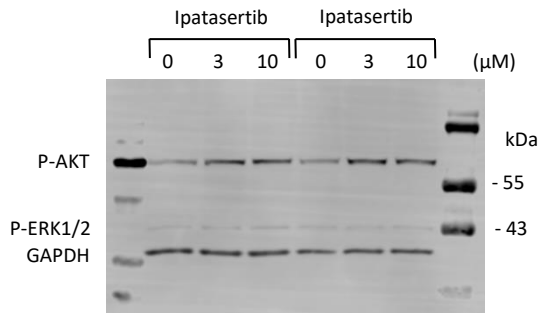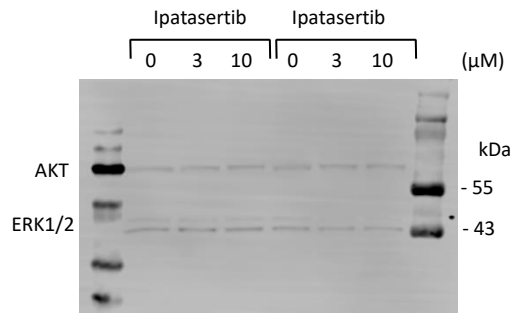

### MK-2206

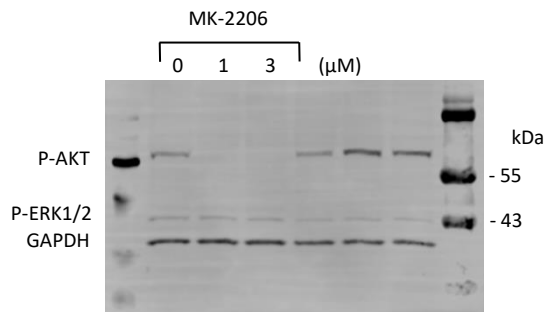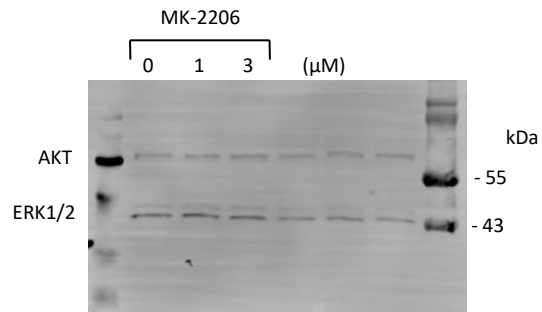

### Regorafenib

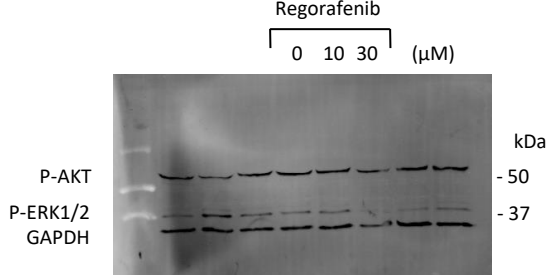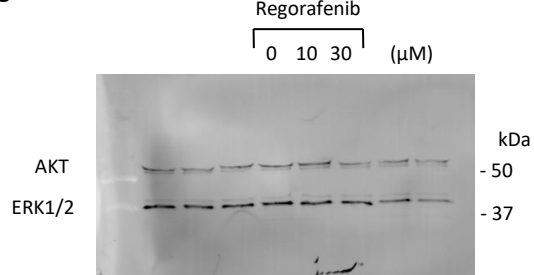

### Trametinib

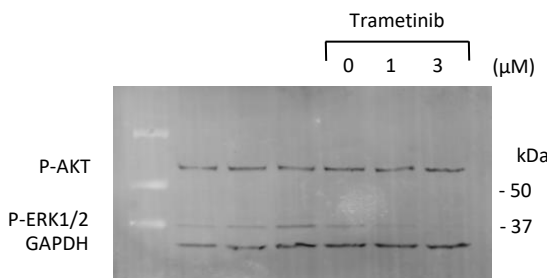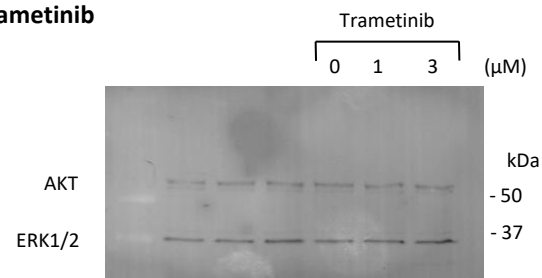

Table S1: Signal intensities from protein bands quantified in immunoblot analyses

|         |       | Dactolisib [nM] |       |      |        |       |       |         |      |       |         |      |      | Ipatasertib [μM] |      |      |        |      |      |         |      |      |         |      |       |
|---------|-------|-----------------|-------|------|--------|-------|-------|---------|------|-------|---------|------|------|------------------|------|------|--------|------|------|---------|------|------|---------|------|-------|
|         |       | HROG02          |       |      | HROG05 |       |       | HROG 15 |      |       | HROG 24 |      |      | HROG02           |      |      | HROG05 |      |      | HROG 15 |      |      | HROG 24 |      |       |
|         |       | 0               | 30    | 100  | 0      | 30    | 100   | 0       | 30   | 100   | 0       | 10   | 30   | 0                | 1    | 3    | 0      | 1    | 3    | 0       | 10   | 30   | 0       | 3    | 10    |
| repl. 1 | P-Akt | 0.67            | 0.49  | 0.39 | 5.72   | 2.99  | 0.89  | 5.78    | 1.43 | 0.03  | 2.81    | 2.37 | 1.42 | 2.03             | 7.12 | 6.66 | 2.79   | 3.03 | 1.68 | 1.34    | 1.92 | 1.99 | 3.56    | 8.46 | 7.65  |
|         | Akt   | 2.27            | 3.09  | 2.2  | 4.49   | 4.56  | 3.87  | 6.23    | 4.95 | 4.05  | 0.84    | 1.19 | 0.81 | 2.19             | 1.83 | 2.02 | 1.08   | 0.91 | 0.41 | 0.79    | 0.63 | 0.4  | 1.36    | 2.17 | 2.21  |
|         | P-Erk | 2.36            | 0.92  | 2.03 | 2.66   | 2.17  | 2.67  | 2.71    | 3.7  | 1.96  | 0.65    | 0.89 | 0.71 | 0.79             | 1.05 | 1.54 | 0.97   | 1.2  | 1.28 | 0.3     | 0.67 | 0.97 | 1.98    | 1.36 | 1.21  |
|         | Erk   | 6.06            | 6.36  | 6.16 | 8.59   | 11.22 | 10.57 | 7.34    | 7.36 | 7.52  | 1.58    | 2.55 | 1.78 | 0.95             | 1    | 1.41 | 0.23   | 0.46 | 0.32 | 2.77    | 3.14 | 5.06 | 4.77    | 3.39 | 3.97  |
|         | GAPDH | 6.35            | 7.43  | 5.94 | 8.13   | 7.42  | 6.03  | 9.85    | 9.5  | 9.98  | 5.24    | 5.71 | 4.48 | 1.42             | 1.35 | 1.97 | 0.53   | 0.42 | 0.23 | 2.22    | 3.65 | 4.55 | 9.01    | 8.49 | 10.4  |
| repl. 2 | P-Akt | 0.4             | 0.09  | 0.05 | 4.92   | 1.88  | 0.84  | 3.27    | 1.42 | 0.21  | 3.14    | 2.32 | 1.51 | 0.8              | 3.89 | 2.85 | 1.71   | 1.93 | 3.94 |         |      |      | 3.86    | 7.98 | 7.29  |
|         | Akt   | 3.3             | 3.86  | 3.32 | 3.93   | 3.64  | 4.34  | 4.92    | 5.94 | 6.39  | 0.88    | 0.86 | 0.96 | 1.45             | 1.54 | 1.3  | 0.58   | 0.35 | 0.85 |         |      |      | 2.12    | 2.31 | 2.69  |
|         | P-Erk | 1.6             | 2.37  | 1.98 | 2.34   | 2.68  | 1.65  | 2.29    | 1.28 | 1.07  | 0.45    | 0.49 | 0.34 | 2.22             | 0.67 | 0.66 | 1.01   | 1.25 | 1.39 | 0.9     | 1.3  | 1.07 | 0.91    | 0.91 | 0.66  |
|         | Erk   | 9.42            | 8.64  | 8.1  | 8.87   | 16.17 | 14.51 | 5.27    | 7.05 | 10.27 | 1.32    | 1.88 | 1.15 | 3.65             | 1.15 | 1.57 | 0.14   | 0.35 | 0.54 | 6.09    | 5.06 | 4.77 | 3.11    | 1.03 | 3.87  |
|         | GAPDH | 7.09            | 8.67  | 8.88 | 5.66   | 8.11  | 8.34  | 8.99    | 9.79 | 9.48  | 5.87    | 5.73 | 5.99 | 14.42            | 6.39 | 7.79 | 3.85   | 2.73 | 5.63 | 5.27    | 4.5  | 5.49 | 10.72   | 7.76 | 10.59 |
| repl. 3 | P-Akt | 3.75            | 0.5   | 0.24 | 15.44  | 6.7   | 1.88  | 6.83    | 0.61 |       | 4.43    | 3.66 | 1.95 | 0.62             | 4.35 | 2.83 | 2.69   | 2.09 | 2.88 | 1.26    | 2.87 | 2.63 | 4.61    | 7.99 | 8.51  |
|         | Akt   | 1               | 0.43  | 0.35 | 3.77   | 1.82  | 1.52  | 1.74    | 0.96 |       | 1.27    | 1.48 | 1.43 | 0.28             | 1.27 | 0.92 | 1.06   | 0.43 | 0.88 | 1.08    | 1.44 | 1.5  | 1.68    | 1.67 | 1.52  |
|         | P-Erk | 2.77            | 2.92  | 2.04 | 3.15   | 2.82  | 2.38  | 3.11    | 2.71 | 0.61  | 1.19    | 0.68 | 0.67 | 0.2              | 0.48 | 0.24 | 0.25   |      | 0.42 | 0.43    | 0.95 | 0.97 | 1.03    | 0.11 | 0.7   |
|         | Erk   | 3.52            | 2.12  | 1.97 | 3.63   | 2.99  | 1.53  | 3.57    | 2.78 | 3.43  | 4.62    | 3.46 | 2.59 | 2.49             | 2.93 | 1.37 | 0.89   |      | 1.03 | 1.29    | 1.6  | 1.43 | 3.73    | 3.38 | 4.66  |
|         | GAPDH | 7.55            | 6.48  | 7.31 | 11.69  | 7.88  | 8.16  | 8.71    | 4.84 | 4.34  | 11.86   | 8.56 | 9.26 | 3.27             | 3.37 | 2.5  | 1.21   | 0.98 | 1.44 | 1.9     | 4.32 | 4.61 | 9.78    | 8.39 | 8.22  |
| repl. 4 | P-Akt | 5.89            | 1.78  | 0.05 | 10.43  | 4.5   | 1.65  | 7.42    | 1.78 | 2.91  | 3.5     | 1.89 | 1.29 | 0.57             | 0.88 | 2.44 | 1.38   | 1.45 | 2.77 | 0.96    | 1.12 | 2.5  | 3.87    | 8.52 | 7.82  |
|         | Akt   | 1.67            | 1.01  | 0.87 | 2.35   | 1.61  | 1.4   | 2.33    | 1.4  | 2.03  | 0.93    | 0.63 | 0.62 | 0.87             | 0.35 | 0.8  | 0.35   | 0.08 | 0.59 | 1.16    | 0.53 | 1.53 | 1.25    | 1.43 | 1.16  |
|         | P-Erk | 2.41            | 4.95  | 3    | 2.11   | 2.8   | 2.92  | 2.78    | 3.57 | 3.72  | 0.23    | 0.28 | 0.13 | 0.61             | 0.32 | 0.52 | 0.55   | 0.3  | 0.05 | 0.36    | 0.46 | 0.57 | 0.63    | 0.23 | 0.07  |
|         | Erk   | 4.82            | 4.24  | 4.19 | 1.98   | 1.87  | 2.9   | 2.79    | 3.05 | 3.13  | 1.42    | 1.57 | 1.48 | 1.82             | 1.41 | 2.96 | 0.29   | 0.6  | 0.67 | 1.43    | 1.6  | 2    | 3.4     | 1.4  | 0.88  |
|         | GAPDH | 11.37           | 11.37 | 7.73 | 8.18   | 6.83  | 6.88  | 6.66    | 6.55 | 8.1   | 7.72    | 6.86 | 7.26 | 3.21             | 2.34 | 3.44 | 2.02   | 1.84 | 2.2  | 4.16    | 4.8  | 4.87 | 5.4     | 6.46 | 6.8   |
| repl. 5 | P-Akt | 1.43            | 0.42  | 0.02 | 1.79   | 0.42  | 0.12  | 1.15    | 0.43 | 0.2   | 2.13    | 2.19 | 1.24 | 1.32             | 2.45 | 5.13 | 1.25   | 4.72 | 5.18 | 3.85    | 6.87 | 5.46 | 2.19    | 5.57 | 5.45  |
|         | Akt   | 0.85            | 0.65  | 0.58 | 0.93   | 0.38  | 0.43  | 0.63    | 0.54 | 0.15  | 0.94    | 1.23 | 1.3  | 1.21             | 0.63 | 1.4  | 0.48   | 0.76 | 0.82 | 1.42    | 1.46 | 1.31 | 0.82    | 1.33 | 1.53  |
|         | P-Erk | 1               | 2.14  | 1.33 | 1.41   | 1.6   | 1.13  | 2.53    | 2.9  | 1.02  | 0.41    | 0.44 | 0.46 | 0.44             | 0.57 | 0.59 | 0.23   | 1.04 | 1.36 | 0.97    | 1.1  | 1.77 | 1.25    | 0.48 | 0.2   |
|         | Erk   | 2.84            | 2.98  | 3.55 | 1.39   | 1.66  | 0.79  | 1.5     | 1.44 | 0.92  | 3.57    | 3.81 | 2    | 5.57             | 8.76 | 6.77 | 1.99   | 6.03 | 8.27 | 1.28    | 1.29 | 2.01 | 2.91    | 3.23 | 1.27  |
|         | GAPDH | 9.58            | 6.66  | 7.47 | 1.92   | 1.82  | 2.2   | 2.81    | 3.68 | 2.75  | 5.66    | 5.5  | 5.88 | 4.21             | 4.64 | 3.27 | 1.19   | 3.35 | 4.11 | 6.08    | 7.38 | 5.89 | 5.88    | 6    | 6.31  |
| repl. 6 | P-Akt | 1.9             | 1.5   | 0.3  | 3.32   | 1.87  | 0.84  | 1.34    | 1.19 | 0.54  | 1.78    | 1.4  | 1.1  | 1.91             | 5.3  | 5.1  | 2.57   | 3.45 | 3.39 | 1.18    | 3.66 | 3.26 | 1.39    | 2.31 | 3.55  |
|         | Akt   | 1.62            | 2.2   | 1.84 | 1.69   | 1.33  | 1.21  | 1.7     | 1.21 | 1.14  | 1.33    | 1.14 | 1.33 | 2.28             | 2.04 | 1.89 | 1.36   | 1.3  | 1.37 | 1.88    | 1.5  | 1.59 | 1.35    | 0.86 | 1.25  |
|         | P-Erk | 3.43            | 4.23  | 3.83 | 1.37   | 1.35  | 1.18  | 2.03    | 2.57 | 2.89  | 0.93    | 1.72 | 2.17 | 2.27             | 3.25 | 2.7  | 1.63   | 1.6  | 1.48 | 1.19    | 1.6  | 1.76 | 0.41    | 1.11 | 1.66  |
|         | Erk   | 6.41            | 6.25  | 5.17 | 3.7    | 3.48  | 2.87  | 2.87    | 2.36 | 2.22  | 2.89    | 2.45 | 2.78 | 8.94             | 7.77 | 6.04 | 3.77   | 4.14 | 4.14 | 3.84    | 2.75 | 2.82 | 3.5     | 2.67 | 2.73  |
|         | GAPDH | 6.47            | 6.66  | 5.74 | 4.08   | 4.54  | 3.95  | 3.73    | 3.39 | 3.55  | 2.99    | 2.72 | 3.06 | 7.12             | 6.74 | 6.37 | 4.25   | 3.82 | 4.07 | 4.39    | 3.89 | 3.8  | 3.15    | 2.75 | 2.92  |

|         |       | MK-2206 [μM] |      |      |        |      |      |         |      |      |         |       |       |
|---------|-------|--------------|------|------|--------|------|------|---------|------|------|---------|-------|-------|
|         |       | HROG02       |      |      | HROG05 |      |      | HROG 15 |      |      | HROG 24 |       |       |
|         |       | 0            | 1    | 3    | 0      | 1    | 3    | 0       | 3    | 10   | 0       | 1     | 3     |
| repl. 1 | P-Akt | 2.61         | 0    | 0    | 2      | 0.23 | 0    | 2.83    | 0.04 | 0.03 | 7.21    | 0     | 0     |
|         | Akt   | 1.18         | 0.72 | 0.04 | 0.46   | 0.64 | 0.38 | 1.02    | 0.98 | 0.79 | 2.25    | 3.15  | 2.09  |
|         | P-Erk | 1.29         | 1.46 | 0.97 | 0.96   | 1.54 | 1.55 | 0.36    | 1.31 | 1.72 | 2.38    | 1.97  | 3.52  |
|         | Erk   | 0.62         | 0.77 | 0.19 | 0.31   | 0.24 | 0.29 | 3.48    | 6.1  | 6.05 | 3.47    | 3.36  | 3.45  |
|         | GAPDH | 4.66         | 3.23 | 1.28 | 2.12   | 2.52 | 2.38 | 4.94    | 6.46 | 5.85 | 14.86   | 14.42 | 12.88 |
| repl. 2 | P-Akt | 1.26         | 0.02 | 0    | 2.16   | 0.26 | 0.16 | 3.49    | 0.03 | 0.01 | 11.66   | 0.42  | 0     |
|         | Akt   | 0.78         | 0.61 | 0.4  | 0.61   | 0.54 | 0.69 | 0.86    | 0.89 | 0.84 | 3.89    | 4.33  | 3.68  |
|         | P-Erk | 1.23         | 1.07 | 0.92 | 1.82   | 1.79 | 1.24 | 1.02    | 0.99 | 0.76 | 0.27    | 1.31  | 2.83  |
|         | Erk   | 0.7          | 0.66 | 0.68 | 0.48   | 0.28 | 0.3  | 3.52    | 3.77 | 3.7  | 4.71    | 8.96  | 8.54  |
|         | GAPDH | 4.94         | 3.9  | 2.79 | 2.61   | 2.5  | 2.97 | 4.01    | 4.38 | 3.65 | 14.45   | 18.71 | 17.57 |
| repl. 3 | P-Akt | 0.86         | 0.14 | 0.51 | 2.45   | 1.14 | 0.19 | 0.85    | 0    | 0.21 | 4.82    | 0.09  | 0     |
|         | Akt   | 0.63         | 0.37 | 0.4  | 0.17   | 0.38 | 0.35 | 1       | 0.73 | 0.68 | 1.87    | 2.03  | 1.77  |
|         | P-Erk | 0.65         | 0.69 | 0.65 | 1.15   | 0.92 | 0.88 | 1.24    | 1.07 | 1.08 | 0.23    | 0.24  | 0.21  |
|         | Erk   | 5.59         | 2.76 | 2.97 | 1.83   | 2.05 | 1.93 | 1.46    | 1.18 | 1.43 | 3.01    | 2.6   | 2.52  |
|         | GAPDH | 5.78         | 3.34 | 2.86 | 2.08   | 2.06 | 2.37 | 4.72    | 4.44 | 3.79 | 8.5     | 9.16  | 7.17  |
| repl. 4 | P-Akt | 0.8          | 0.32 | 0    | 1.36   | 0    | 0    | 0.87    | 0.14 | 0.12 | 3.09    | 0.02  | 0.18  |
|         | Akt   | 0.27         | 0.71 | 0.73 | 0.42   | 0.38 | 0.36 | 0.84    | 0.73 | 0.54 | 1.05    | 1.06  | 1.37  |
|         | P-Erk | 0.43         | 0.72 | 1    | 0.99   | 0.56 | 0.29 | 0.64    | 0.78 | 0.56 | 0.81    | 0.91  | 1     |
|         | Erk   | 2.44         | 1.95 | 3.34 | 2.33   | 1.14 | 0.93 | 1.19    | 1.81 | 1.06 | 1.8     | 2.55  | 2.89  |
|         | GAPDH | 4.75         | 4.3  | 4.24 | 2.67   | 1.95 | 1.43 | 3.55    | 4.69 | 3.2  | 5.38    | 5.46  | 6.53  |
| repl. 5 | P-Akt | 1.15         | 0    | 0    | 2.02   | 0.76 | 0.01 | 4.65    | 0.04 | 0.01 | 3.39    | 0     | 0     |
|         | Akt   | 0.97         | 1.1  | 0.63 | 0.52   | 1.96 | 0.69 | 1.9     | 0.43 | 1.22 | 1.77    | 1.66  | 1.8   |
|         | P-Erk | 1.53         | 0.89 | 0.21 | 1.06   | 2.65 | 0.57 | 1.74    | 1.22 | 0.43 | 1.07    | 1.12  | 1.24  |
|         | Erk   | 7.71         | 5.94 | 3.38 | 2.94   | 7.03 | 2.16 | 2.14    | 1.27 | 0.87 | 3.89    | 3.83  | 4.05  |
|         | GAPDH | 3.68         | 2.75 | 5.12 | 1.92   | 4.47 | 3.95 | 7.05    | 6.03 | 4.3  | 7.88    | 7.97  | 7.81  |
| repl. 6 | P-Akt | 1.48         | 0    | 0    | 1.53   | 0.15 | 0.05 | 0.37    | 0    | 0.03 | 0.90    | 0.07  | 0.03  |
|         | Akt   | 1.87         | 0.97 | 2.62 | 0.77   | 0.61 | 0.66 | 0.82    | 0.62 | 0.78 | 0.69    | 0.56  | 0.50  |
|         | P-Erk | 0.87         | 0.67 | 0.68 | 1.02   | 0.91 | 0.88 | 0.51    | 0.37 | 0.94 | 0.34    | 0.23  | 0.21  |
|         | Erk   | 5.27         | 3.11 | 2.80 | 1.67   | 1.47 | 1.67 | 1.82    | 1.25 | 1.53 | 2.04    | 1.64  | 1.40  |
|         | GAPDH | 4.24         | 2.69 | 2.62 | 2.62   | 2.27 | 1.83 | 2.08    | 1.47 | 1.74 | 1.70    | 1.23  | 1.13  |



Table S2: Signal intensities from protein bands quantified in immunoblot analyses

|         |       | Regorafenib (μM) |       |       |        |       |       |         |      |      |         |       |       | Trametinib (μM) |       |       |        |       |       |         |       |       |         |       |      |
|---------|-------|------------------|-------|-------|--------|-------|-------|---------|------|------|---------|-------|-------|-----------------|-------|-------|--------|-------|-------|---------|-------|-------|---------|-------|------|
|         |       | HROG02           |       |       | HROG05 |       |       | HROG 15 |      |      | HROG 24 |       |       | HROG02          |       |       | HROG05 |       |       | HROG 15 |       |       | HROG 24 |       |      |
|         |       | 0                | 10    | 30    | 0      | 10    | 30    | 0       | 10   | 30   | 0       | 10    | 30    | 0               | 1     | 3     | 0      | 1     | 3     | 0       | 1     | 3     | 0       | 1     | 3    |
| repl. 1 | P-Akt | 2.65             | 3.45  | 3.11  | 6.23   | 5.19  | 4.7   | 2.99    | 0.18 | 0.05 | 4.24    | 2.62  | 2.8   | 1.09            | 6.78  | 9.56  | 6.43   | 7.5   | 6.39  | 4.08    | 5.78  | 6.5   | 5.89    | 9.67  | 6.02 |
|         | Akt   | 4.22             | 5.69  | 4.23  | 4.11   | 3.89  | 3.22  | 5.76    | 3.21 | 0.57 | 5.7     | 4.76  | 5.28  | 3.12            | 6.94  | 10.06 | 5.6    | 5.75  | 5.33  | 8.96    | 8.8   | 9.94  | 6.25    | 9.72  | 5.6  |
|         | P-Erk | 2.73             | 3.21  | 1.32  | 2.58   | 1.95  | 1.17  | 0.89    | 0.39 | 0.46 | 0.97    | 0.62  | 0.11  | 5.46            | 0.436 | 0.796 | 2.26   | 0     | 0     | 2.42    | 0.544 | 0.214 | 2.03    | 0     | 0    |
|         | Erk   | 7.63             | 10.45 | 8.73  | 3.54   | 3.45  | 3.55  | 2.65    | 3.63 | 2.88 | 2.97    | 2.98  | 2.61  | 17.38           | 9.42  | 16.96 | 9.07   | 8.85  | 7.95  | 5.66    | 4.5   | 5.98  | 1.72    | 0.64  | 1.17 |
|         | GAPDH | 5.79             | 6.3   | 5.96  | 4.38   | 4.33  | 4.36  | 16.2    | 16.2 | 14.4 | 3.19    | 3.3   | 2.41  | 16.72           | 7.92  | 16.14 | 7.26   | 6.58  | 5.62  | 33.2    | 26.6  | 26.8  | 5.64    | 8.8   | 7.29 |
| repl. 2 | P-Akt | 1.66             | 2.18  | 4.08  | 4.21   | 3.39  | 6.57  | 1.57    | 0.56 | 0.46 | 4.98    | 2.66  | 4.94  | 6.48            | 6.44  | 3.74  | 10.73  | 12.68 | 15.97 | 1.07    | 1.83  | 4.06  | 6.37    | 13.45 | 11   |
|         | Akt   | 2.62             | 3.18  | 5.3   | 2.06   | 1.64  | 3.9   | 2.32    | 2.25 | 1.71 | 4.26    | 2.82  | 4.87  | 10.08           | 8.98  | 5.2   | 4.05   | 4.42  | 5.81  | 3.82    | 3.6   | 4.76  | 2.08    | 4.11  | 2.91 |
|         | P-Erk | 3.42             | 3.66  | 1.58  | 2.07   | 0.94  | 0.84  | 0.48    | 0.43 | 0.11 | 1.48    | 2.04  | 0.5   | 2.32            | 0     | 0     | 18.93  | 20.9  | 24.6  | 0.84    | 0     | 0     | 4.24    | 0.5   | 0.1  |
|         | Erk   | 3.58             | 3.63  | 0.94  | 5.63   | 5.27  | 10    | 1.68    | 1.43 | 1.78 | 1.5     | 2.2   | 1.5   | 13.66           | 16.72 | 8.28  | 7.7    | 8.36  | 11.54 | 4.74    | 4.08  | 3.02  | 3.63    | 7.32  | 8.81 |
|         | GAPDH | 8.13             | 4.72  | 6.63  | 4.38   | 4     | 3.85  | 11.9    | 10.6 | 8.7  | 7.32    | 4.9   | 7.56  | 15.48           | 17.8  | 12.48 | 7.41   | 8.65  | 9.65  | 21.8    | 20.6  | 17.64 | 7.02    | 7.23  | 7.7  |
| repl. 3 | P-Akt | 2.45             | 3.13  | 3.26  | 1.85   | 5.27  | 5.43  | 1.09    | 0    | 0.53 | 1.92    | 3.5   | 2.1   | 5.78            | 6.18  | 7.88  | 5.76   | 8.49  | 4.53  | 3.78    | 2.88  | 3.8   | 0.72    | 1.52  | 0.71 |
|         | Akt   | 4.22             | 5.35  | 3.61  | 0.9    | 2.2   | 2.17  | 2.79    | 1.49 | 1.78 | 1.55    | 1.58  | 0.79  | 10.84           | 11.74 | 13.5  | 3.4    | 4.31  | 2.18  | 4.46    | 3.62  | 4.74  | 0.81    | 0.82  | 0.4  |
|         | P-Erk | 3.06             | 3.69  | 1.4   | 4.49   | 2.96  | 0.94  | 0.48    | 0.62 | 0.28 | 5.35    | 6.27  | 5.61  | 3.9             | 0.35  | 0.20  | 6.32   | 0     | 0     | 1.16    | 0     | 0.03  | 3.2     | 0     | 0    |
|         | Erk   | 9.72             | 13.87 | 10.3  | 3.84   | 5.6   | 6.07  | 1.85    | 1.74 | 1.44 | 4.8     | 6.43  | 4.12  | 16.2            | 20    | 16.64 | 7.51   | 9.91  | 6.86  | 2.12    | 1.196 | 2.1   | 2.95    | 3.06  | 3.39 |
|         | GAPDH | 7.57             | 5.98  | 4.57  | 4.21   | 6.13  | 5.48  | 12.9    | 8.44 | 8.74 | 1.65    | 2.32  | 1.84  | 15.66           | 19.12 | 26.8  | 8.22   | 8.47  | 5.96  | 15.9    | 12.58 | 12.38 | 2.56    | 2.77  | 3.4  |
| repl. 4 | P-Akt | 1.72             | 2.86  | 3.41  | 3.93   | 4.91  | 2.84  | 1.8     | 0.43 | 0.31 | 3.6     | 3.01  | 1.59  | 3.94            | 1.65  | 1.78  | 2.1    | 2.4   | 2.04  | 4.2     | 5.48  | 5.66  | 3.68    | 2.91  | 4.18 |
|         | Akt   | 1.3              | 1.6   | 1.43  | 0.6    | 0.83  | 0.96  | 2.54    | 2.43 | 1.78 | 2.88    | 3.15  | 1.78  | 4.16            | 2     | 2.06  | 0.85   | 0.83  | 0.74  | 3.86    | 5.04  | 5.78  | 0.51    | 0.44  | 0.48 |
|         | P-Erk | 5.76             | 5.19  | 3.54  | 1.9    | 0.83  | 1.89  | 0.91    | 0.47 | 0.04 | 1.37    | 2.02  | 0.48  | 2.86            | 0.76  | 0.33  | 1.63   | 0     | 0     | 1.23    | 0.06  | 0.31  | 0.32    | 0     | 0    |
|         | Erk   | 10.51            | 8.23  | 9.35  | 1.14   | 1.41  | 0.79  | 1.65    | 1.54 | 1.04 | 5.84    | 5.41  | 4.92  | 7.6             | 3.16  | 3.06  | 1.77   | 1.99  | 2.92  | 2.36    | 3.44  | 3.5   | 1.9     | 1.69  | 1.9  |
|         | GAPDH | 4.15             | 4.05  | 6.11  | 8.24   | 6.68  | 6.17  | 11.2    | 9.02 | 8.94 | 4.1     | 5.03  | 2.6   | 11.06           | 7.58  | 6.18  | 3.01   | 1.35  | 2.73  | 16.4    | 20.8  | 20.8  | 5.39    | 4.89  | 5.47 |
| repl. 5 | P-Akt | 2.04             | 2     | 2.44  | 2.94   | 3.14  | 3.6   | 2.64    | 0.78 | 0.50 | 12.28   | 13.6  | 12.92 | 0.85            | 3.56  | 3     | 4.61   | 3.62  | 5.49  | 6.2     | 6.78  | 5.24  | 1.49    | 2.54  | 3.21 |
|         | Akt   | 4.59             | 7.24  | 6.92  | 2.85   | 2.89  | 3.19  | 3.29    | 3.3  | 2.21 | 0.87    | 0.78  | 0.42  | 2.9             | 4     | 4.74  | 0.75   | 0.61  | 0.84  | 6.2     | 5.98  | 4.42  | 2.22    | 2.72  | 2.55 |
|         | P-Erk | 13.5             | 14.28 | 5.53  | 2.33   | 3.4   | 3.01  | 0.66    | 0.29 | 0.03 | 3.39    | 0     | 0     | 4.16            | 0     | 0     | 1.22   | 0     | 0     | 0.99    | 0.08  | 0.58  | 3.21    | 3.87  | 4.08 |
|         | Erk   | 15.06            | 18.13 | 14.63 | 4      | 7.83  | 6.65  | 3.4     | 2.67 | 2.87 | 2.24    | 1.93  | 1.44  | 15.72           | 7.38  | 5.9   | 0.55   | 0.61  | 0.82  | 3.56    | 4.26  | 4.84  | 8.29    | 7.57  | 6.41 |
|         | GAPDH | 13.86            | 10.52 | 13.15 | 1.61   | 10.11 | 8.23  | 12.5    | 10.6 | 10.4 | 7.4     | 8.38  | 7.24  | 13.32           | 9.12  | 11.18 | 4.93   | 7.59  | 5.84  | 15.9    | 19.04 | 19.42 | 8       | 7.62  | 6.77 |
| repl. 6 | P-Akt | 8.21             | 6.67  | 7.86  | 7      | 9.23  | 8.37  | 1.8     | 1.89 | 0.97 | 7.51    | 4.91  | 5.29  | 2.56            | 8.72  | 3.62  | 5.15   | 12.52 | 11.99 | 8.18    | 8.9   | 3.22  | 3.63    | 6.34  | 8.66 |
|         | Akt   | 17.9             | 18.81 | 17.53 | 10.74  | 11.12 | 10.76 | 3.53    | 4.35 | 1.07 | 12.23   | 11.06 | 10.04 | 3.92            | 7.86  | 2.84  | 1.91   | 3.98  | 3.61  | 7.1     | 7.26  | 3.62  | 1.98    | 2.59  | 4.11 |
|         | P-Erk | 6.57             | 6.21  | 2.61  | 2.26   | 1.93  | 0.36  | 0.86    | 0.82 | 0.04 | 2.92    | 1.12  | 0.97  | 4.56            | 0.31  | 0.97  | 2.22   | 0     | 0     | 1.19    | 0.50  | 0.58  | 1.3     | 0     | 0    |
|         | Erk   | 11.09            | 9.28  | 9.27  | 4.15   | 5.18  | 3.94  | 2.19    | 3.18 | 0.65 | 5.88    | 4.7   | 5.01  | 9.4             | 10.66 | 4.68  | 2.82   | 4.33  | 5.02  | 4.02    | 5.54  | 4.98  | 2.03    | 3.28  | 4.12 |
|         | GAPDH | 21.96            | 19.12 | 18.68 | 6.76   | 9.32  | 5.98  | 9.15    | 5.83 | 4.32 | 8.19    | 6.8   | 6.23  | 7.72            | 9.92  | 4.14  | 3.34   | 6.45  | 5.92  | 16.74   | 17.52 | 19.64 | 4.23    | 4.3   | 7.09 |
| repl. 7 | P-Akt | 3.5              | 4.16  | 5.79  | 6.28   | 6.59  | 7.12  | 2.69    | 0.76 | 1.07 | 5.49    | 4.34  | 4.18  | 3.02            | 6.18  | 7.58  | 13.86  | 18.18 | 15.38 | 4.5     | 5.06  | 7.12  |         |       |      |
|         | Akt   | 3.19             | 4.07  | 3.52  | 1.97   | 1.82  | 1.67  | 2.75    | 2.45 | 1.72 | 2.3     | 1.96  | 1.82  | 5.18            | 7.9   | 10.38 | 5.41   | 6.31  | 5.46  | 4.3     | 6.84  | 5.18  |         |       |      |
|         | P-Erk |                  |       |       |        |       |       |         |      |      | 1.46    | 0.75  | 0     | 2.96            | 0.15  | 0.07  | 2.79   | 0     | 0     | 1.10    | 0.04  | 0.10  |         |       |      |
|         | Erk   |                  |       |       |        |       |       |         |      |      | 2.74    | 4.38  | 2.86  | 7.76            | 13.54 | 11.88 | 5.42   | 6.45  | 6.06  | 3.54    | 3.18  | 4.26  |         |       |      |
|         | GAPDH | 7                | 3.87  | 2.96  | 2.36   | 2.21  | 1.4   | 8.56    | 7.91 | 7.07 | 4.55    | 5.39  | 2.32  | 10.6            | 12.8  | 15.7  | 9.67   | 8.13  | 7.79  | 9.6     | 13.38 | 19.58 |         |       |      |
